1           **Conidial melanin of the human pathogenic fungus *Aspergillus***  
2           ***fumigatus* disrupts cell autonomous defenses in amoebae**

3

4

5   Iuliia Ferling<sup>1,2</sup>, Joe Dan Dunn<sup>3</sup>, Alexander Ferling<sup>4</sup>, Thierry Soldati<sup>3</sup>, and Falk Hillmann<sup>1#</sup>

6

7

8   Short title: **Fungal pigment delays phagosome maturation in amoebae**

9

10   <sup>1</sup>Junior Research Group Evolution of Microbial Interaction, Leibniz Institute for Natural  
11   Product Research and Infection Biology - Hans Knöll Institute (HKI), Jena, Germany

12   <sup>2</sup> Institute of Microbiology, Friedrich Schiller University Jena, Jena, Germany

13   <sup>3</sup> Department of Biochemistry, Faculty of Science, University of Geneva, Geneva,  
14   Switzerland

15   <sup>4</sup> Heid-Tech, Technische Schule Heidenheim, Germany

16

17   #Address correspondence to Falk Hillmann, [Falk.hillmann@leibniz-hki.de](mailto:Falk.hillmann@leibniz-hki.de)

18   Phone / Fax: +49-3641-532-1445 / +49-3641-532-2445

## 19 **Abstract**

20 The human pathogenic fungus *Aspergillus fumigatus* is a ubiquitous saprophyte that  
21 causes fatal infections in immunocompromised individuals. Following inhalation, conidia  
22 are ingested by innate immune cells and can arrest phagolysosome maturation. How  
23 such general virulence traits could have been selected for in natural environments is  
24 unknown. Here, we used the model amoeba *Dictyostelium discoideum* to follow the  
25 antagonistic interaction of *A. fumigatus* conidia with environmental phagocytes in real  
26 time. We found that conidia covered with the green pigment 1,8-dihydroxynaphthalene-  
27 (DHN)-melanin were internalized at far lower rates when compared to those lacking the  
28 pigment, despite high rates of initial attachment. Immediately after uptake of the fungal  
29 conidia, nascent phagosomes were formed through sequential membrane fusion and  
30 fission events. Using single-cell assays supported by a computational model integrating  
31 the differential dynamics of internalization and phagolysosome maturation, we could  
32 show that acidification of phagolysosomes was transient and was followed by  
33 neutralization and, finally, exocytosis of the conidium. For unpigmented conidia, the  
34 cycle was completed in less than 1 h, while the process was delayed for conidia covered  
35 with DHN-melanin. At later stages of infection, damage to infected phagocytes triggered  
36 the ESCRT membrane repair machinery, whose recruitment was also attenuated by  
37 DHN-melanin, favoring prolonged persistence and the establishment of an intracellular  
38 germination niche in this environmental phagocyte. Increased exposure of DHN-melanin  
39 on the conidial surface also improved fungal survival when confronted with the  
40 fungivorous predator *Protostelium aurantium*, demonstrating its universal anti-  
41 phagocytic properties.

42

43 **Keywords**

44 *Aspergillus fumigatus*, *Dictyostelium discoideum*, *Protostelium aurantium*, DHN-melanin,  
45 phagocytosis, phagosome maturation, acidification, v-ATPase, ROS, NADPH oxidase,  
46 membrane damage, membrane repair, ESCRT machinery.

## 47 **Introduction**

48 The ubiquitous filamentous fungus *Aspergillus fumigatus* is most commonly found in the  
49 soil or on decaying organic matter and randomly infects immunocompromised  
50 individuals after inhalation of its conidia (Brakhage and Langfelder, 2002). Over 200,000  
51 life-threatening infections are caused by *A. fumigatus* annually, with mortality rates of  
52 infected individuals ranging from 30-90% (Brown et al., 2012, Bongomin et al., 2017).  
53 Poor diagnosis, often rapid disease progression and gaps in our understanding of the  
54 early stages of infection are currently limiting therapeutic options.

55 The green-greyish conidial pigment 1,8-dihydroxynaphthalene (DHN)-melanin is among  
56 the first microbe-associated molecular patterns that the host encounters during infection.  
57 It has been shown that the presence of DHN-melanin interferes with conidial uptake and  
58 processing in mammalian phagocytes and can inhibit apoptosis in endothelial lung cells  
59 (Thywissen et al., 2011, Slesiona et al., 2012, Heinekamp et al., 2012, Volling et al.,  
60 2011, Amin et al., 2014, Akoumianaki et al., 2016, Jahn et al., 2002). Myeloid and  
61 endothelial cells of the lung recognize DHN-melanin itself via the C-type lectin receptor  
62 MelLec, which plays an important role in the protective antifungal immunity of both mice  
63 and humans (Stappers et al., 2018). The processing of conidia by phagocytic cells is  
64 crucial to understand, as these cell types are involved in the defense and also the  
65 dissemination of the fungus. Recent experiments with macrophages showed that  
66 melanized conidia of *A. fumigatus* interfere with phagosome acidification by preventing  
67 the formation of lipid rafts that are essential for v-ATPase proton pump assembly  
68 (Schmidt et al., 2019). Upon germination, the DHN-melanin layer is lost, exposing chitin,  
69 glycoproteins, and  $\beta$ -1,3-glucan, whose exposure facilitates recognition, phagocytic  
70 uptake and killing by immune cells (Chai et al., 2010, Luther et al., 2007). The

71 biochemical fate of fungal melanin following swelling and germination is thus far  
72 unknown.

73 In contrast to commensal pathogens such as *Candida albicans*, *A. fumigatus* is  
74 considered an environmentally acquired pathogen, as it is frequently isolated from  
75 natural reservoirs and occupies a well-established niche as a decomposer of organic  
76 matter. In its natural environment the fungus is confronted with many abiotic and biotic  
77 adverse conditions such as amoebae with some of them being able to ingest and even  
78 kill *A. fumigatus* (Hillmann et al., 2015, Radosa et al., 2019a). During evolution it can  
79 thus be expected that microorganisms such as *A. fumigatus* have acquired counter  
80 defense strategies that also might explain the virulence of environmental pathogens for  
81 humans. This hypothesis was recently coined as the “Amoeboid predator-animal  
82 virulence hypothesis”. According to this hypothesis microorganisms trained their  
83 virulence through competition with microbial predators (Casadevall et al., 2019). In  
84 agreement with this hypothesis, several recent studies demonstrated that *A. fumigatus*  
85 interactions with soil amoeba such as *Acanthamoeba castellanii* or *Dictyostelium*  
86 *discoideum* exhibited similar outcomes to its interactions with human phagocytes (Van  
87 Waeyenberghe et al., 2013, Hillmann et al., 2015, Mattern et al., 2015).

88 *D. discoideum* is a professional soil phagocyte that constantly engulfs microbes for food  
89 and thus has to protect itself from potentially harmful intracellular pathogens (Cosson  
90 and Soldati, 2008, Dunn et al., 2018). To avoid infection, the phagocytic host has to  
91 eliminate pathogens by forming a functional phagosome before they can escape or  
92 establish a survival niche. After engulfment, the pathogen is trapped inside the nascent  
93 phagosome, which is mainly derived from the plasma membrane. Initially, it lacks any  
94 microbicidal capacity that is essential for pathogen control. By a sequence of membrane

95 fusion and fission events, the phagosome acquires its full range of antimicrobial and  
96 degradative features. This conversion is known as phagosome maturation, during which  
97 the compartment undergoes consecutive fusion with early and late endosomes and  
98 lysosomes (Flannagan et al., 2009). The final step of phagosome maturation is its  
99 resolution, during which the phagosomal content becomes recycled, and indigestible  
100 material is exocytosed (see (Dunn et al., 2018) for review).

101 The majority of intracellular pathogens reside in a vesicular compartment, where they  
102 hijack the defense machinery of the cell to get access to host resources, but some  
103 bacteria have evolved an arsenal of strategies to invade the host cytosol by utilizing  
104 pore-forming toxins, phospholipases or effector-delivery systems, Examples include  
105 *Listeria* and *Shigella* which launch an early escape, while *Mycobacteria* and *Salmonella*  
106 execute a partial or delayed escape from the phagosome (Friedrich et al., 2012). In  
107 contrast, the human pathogenic fungus *Cryptococcus neoformans* escapes from *D.*  
108 *discoideum* to the extracellular space by both WASH-mediated constitutive exocytosis  
109 and vomocytosis (Watkins et al., 2018).

110 Professional phagocytes developed various methods to combat intracellular  
111 microorganisms establishing a toxic, bactericidal environment inside the phagosome  
112 and using a combination of cytosolic machineries, such as ESCRT and autophagy, to  
113 restrict the pathogens. Plenty of relevant environmental pathogens have co-evolved with  
114 their hosts to overcome the defenses of the host cell, which allows them to proliferate or  
115 achieve a state of latency. As conidia of *A. fumigatus* were shown to interfere with  
116 phagolysosome maturation in phagocytes from mammalian hosts, we have used two  
117 model amoeba to assess whether this strategy of the fungus may have even broader

118 host specificity and thus, could provide a selective advantage for the fungus in its natural  
119 environment.

## 120 **Results**

### 121 **1,8-DHN-melanin delays phagocytic uptake and phagolysosome maturation**

122 To initiate phagocytosis, host receptors engage with ligands exposed on the surface of  
123 *A. fumigatus* conidia. This association with its ligand initiates signaling pathways that  
124 cause the extension of a lamellipodium, which surrounds the particle and generates the  
125 nascent phagosome. The surface layer of wildtype fungal conidia consists of  $\alpha$ -1,3-  
126 glucan covered by DHN-melanin and a hydrophobic, proteinaceous rodlet layer. The  
127 surface of conidia of the melanin-deficient mutant  $\Delta pksP$  is composed of the rodlet layer,  
128 glycoproteins, and chitin (Valsecchi et al., 2018).

129 We first analyzed infection outcomes after co-incubation of *D. discoideum* with wild-type  
130 and *pksP* mutant conidia of *A. fumigatus*. After 1 h of co-incubation we found that *D.*  
131 *discoideum* amoebae had ingested 63% of the melanin-deficient  $\Delta pksP$  conidia, but only  
132 20% of the wild-type conidia (Figure 1A-B). The phagocytic efficiencies determined for  
133 wild-type and  $\Delta pksP$  conidia were lower and higher than the ones for inert silica  
134 particles, respectively (Figure 1C and S1A). Melanin ghosts obtained after harsh  
135 chemical treatment of wild-type conidia were rarely taken up by the amoeba. However,  
136 these empty shells of melanin would readily associate with the amoeba cell wall,  
137 covering the entire surface (Figure 1A+B and Figure S1A). Collectively, our results  
138 suggested that DHN-melanin might have an impact on the uptake process of conidia.  
139 This conclusion was further supported by an experiment with the DHN-melanin  
140 monomer 1,8-dihydroxynaphthalene, which also repressed phagocytosis of beads in a  
141 dose-dependent manner (Figure 1D).

142 We were further interested in the intracellular fate of the conidia and frequently observed  
143 conidial exocytosis. We thus followed the infection process at the single-cell level and



144 monitored the time of intracellular transit of conidia in *D. discoideum*. Conidia were  
145 stained with FITC (green) and with CF594 (red) for the normalization of signal intensity  
146 (Figure S1B and S2). Ratiometric calculations of the differences between the two dyes,  
147 with FITC responding to changes in pH, allowed us to track the phagosomal pH  
148 dynamics for conidia over the entire intracellular period (Figure 1E). These  
149 measurements demonstrated that both wildtype and  $\Delta pksP$  mutant conidia underwent  
150 rapid acidification followed by neutralization and subsequent exocytosis. This  
151 phagosomal processing was previously reported to also occur with inert particles, which  
152 complete the process of acidification, neutralization and exocytosis within 1 h  
153 (Gopaldass et al., 2012). Phagosome maturation and exocytosis of resting melanin-  
154 deficient conidia were completed at a time scale resembling that of inert particles  
155 (Figure 1E). Notably, wild-type conidia resided significantly longer inside phagolysosome  
156 than  $\Delta pksP$  conidia (Figure 1F, Figure S1B), which suggested interference at single or  
157 multiple stages of the phagosome maturation process.

158

### 159 **Functional v-ATPase is trafficked to *A. fumigatus* containing phagosomes**

160 Proton transport into intracellular organelles is mainly accomplished by the vacuolar-  
161 ATPase (v-ATPase). This enzyme complex is composed of two multi-subunit domains,  
162 which together pump H<sup>+</sup> into the lumen in an ATP-dependent manner. In *D. discoideum*  
163 the v-ATPase is mainly localized at membranes of the contractile vacuole, an  
164 osmoregulatory organelle, and at the membranes of endosomes to generate their acidic  
165 luminal environment (Liu and Clarke, 1996). To visualize the real-time distribution of the  
166 enzyme complex, we employed *D. discoideum* strains expressing fusions of the v-  
167 ATPase membrane channel subunit VatM and the cytosolic domain VatB with green and

168 red fluorescent proteins, respectively (Clarke et al., 2002). A combination of these two  
169 marker proteins previously revealed the principal route of delivery of the v-ATPase to  
170 phagosomes (Clarke et al., 2010).

171 Live, single-cell imaging of FITC-stained conidia after uptake by VatB-RFP-expressing  
172 amoeba demonstrated the correlation between v-ATPase recruitment and acidification.  
173 Fast acidification and v-ATPase trafficking to the surface of the phagosome was  
174 followed by its retrieval and subsequent neutralization of the phagosomal lumen, with  
175 conidial exocytosis as the final step (Figure 2A). As expected from the previous  
176 experiments, the acidification kinetics for wild-type and  $\Delta pksP$  conidia varied  
177 significantly. Both fungal strains triggered acidification within minutes, but amoebae  
178 infected with wild-type- conidia were delayed in reaching the minimum and maximum  
179 pHs (Figure 2B). Also, following VatB-RFP retrieval, phagosomes took significantly  
180 longer to reach pH 6 again when infected with DHN-melanin-covered wild-type conidia  
181 when compared to  $\Delta pksP$  conidia-containing phagosomes (Figure 2C).

182

### 183 **A simulation-based prediction of maturation dynamics in long-term** 184 **confrontations**

185 The different dynamics of uptake, acidification and exocytosis for both strains  
186 determined from single-cell observations were used in a Monte-Carlo simulation to  
187 predict the outcome of long-term confrontations (Figure 3A and B). The simulation was  
188 executed with the following experimentally determined parameters for wild type and  
189  $\Delta pksP$  conidia, respectively: conidial uptake probability of 20 and 63%, acidic time spans  
190 of 52 and 32 min, and exocytosis at 87 and 53 min after uptake. Assuming an amoeba  
191 population of  $10^4$  cells infected at an MOI of 10 ( $10^5$  conidia in total), the computational

192 simulation predicted that the different rates of uptake and phagosome maturation for  
193 wildtype and melanin-deficient conidia would yield significantly different acidification  
194 patterns across the infected amoeba populations. Infections with melanized vs. non-  
195 melanized conidia yielded 100% vs. 82% of acidified phagolysosomes after 30 mpi,  
196 respectively, while 36% of phagolysosomes containing wild-type conidia and 48% of  
197 those containing  $\Delta pksP$  conidia-were acidified after five hours of co-incubation. As the  
198 period between uptake and acidification of the phagosome was too short to allow for  
199 accurate measurement, we set this value to zero, which may have influenced the  
200 precision of the computational model. Nevertheless, the time frame for the trafficking of  
201 the v-ATPase (Figure 3C-F), as well as the fact that nearly all v-ATPase-containing  
202 phagosomes were also acidic (Figure S3) confirmed the Monte-Carlo model prediction  
203 with reasonable accuracy and further supports the finding that phagosome maturation is  
204 delayed by the presence of DHN-melanin.

205

## 206 **ROS generation coincides with damage to *A. fumigatus*-containing** 207 **phagolysosomes**

208 NADPH oxidase (NOX) is heteromultimeric, membrane bound complex that produces  
209 intraphagosomal ROS. The enzyme also plays an important role during *A. fumigatus*  
210 infection in humans (reviewed in (Hogan and Wheeler, 2014)) *D. discoideum* encodes  
211 three NOX catalytic subunits, i.e., *noxA-C*, with NoxA and B being homologues of the  
212 mammalian gp91<sup>phox</sup> subunit. A single gene, *cybA*, encodes the only *D. discoideum*  
213 homologue of the p22<sup>phox</sup> subunit of the mammalian NADPH oxidase (Lardy et al., 2005,  
214 Dunn et al., 2018). With wild type conidia we detected CybA at the phagosome only  
215 after 1 h of infection (Figure 4). Further, highly acidic phagosomes were generally

216 devoid of CybA (Figure 4A). At this time point, the phagosomal pH was still highly  
217 variable among different phagosomes even within single cells, presumably due to  
218 asynchronous internalization (Fig. 4B). After 2 h of infection, 81 % of all phagosomes  
219 were positive for ROS, but even in amoebae lacking all three *nox* genes, ROS  
220 production was detected in approximately 50 % of all phagosomes, demonstrating that  
221 the NOX proteins are a substantial but not only source of ROS in phagosomes (Figure  
222 4C and Figure S4). At this stage of infection, CybA-positive phagosomes containing the  
223 melanin-deficient  $\Delta pksP$  conidia displayed an average pH of around 6.2 , while the pH of  
224 CybA-positive phagosomes containing wild-type conidia was approximately 7.2 (Figure  
225 4D). This relatively high pH may be attributed either to higher NADPH oxidase activity  
226 neutralizing the phagosome more effectively through increased formation of  $\cdot O_2^-$  or,  
227 more likely, to a leakage of protons from the phagosome mediated by damage to the  
228 phagosomal membrane.

229

### 230 **Lysosome fusion indicates damage to *A. fumigatus*-containing phagosomes**

231 Proper phagosome maturation involves the fusion of early/late phagosomes with  
232 lysosomes, which load proteolytic enzymes for digestion of the phagolysosomal content.  
233 To monitor lysosomes and their fusion with phagosomes, the lysosomes of amoebae  
234 were loaded with fluorescently labelled 70-kDa-dextran prior to infection with conidia.  
235 When loaded lysosomes fused to conidia-containing phagosome dextrans were visible  
236 as a ring around the conidia (Figure 5A). By measuring the normalized integrated  
237 density of these rings, we concluded that the phagolysosome fusion was equally  
238 effective for melanized and non-melanized conidia (Figure 5B). We substantiated this  
239 data by analyzing vacuolin, a postlysosomal marker that represents a functional

240 homologue of the metazoan lipid-raft microdomain chaperon flotillin (Bosmani et al.,  
241 2019). In agreement with the data obtained for dextran accumulation, vacuolin gradually  
242 accumulated in the membrane of both phagolysosomes containing either wildtype- or  
243  $\Delta pksP$ -conidia (Figure S5). Collectively, these data suggested that the lysosomal fusion  
244 is not inhibited.

245 Because the maturation of the phagolysosomes appeared not to be affected, we  
246 reasoned that the pH difference between CybA-positive phagosomes containing  
247 wildtype conidia and  $\Delta pksP$  conidia resulted from differences in the integrity of the  
248 phagolysosomal membrane. Therefore, we preloaded the lysosomes of the amoeba with  
249 a dextran of the low molecular mass of 4.4 kDa. As shown in Figure 5C and 5D,  
250 amoebae infected with wild-type conidia displayed almost no rings, in contrast to the  
251 phagolysosomes of the melanin-deficient mutant, which retained the dextran (Figure  
252 5C+D). These results suggested that wild-type conidia resided in leaky phagolysosomes  
253 contrary to the conidia of the  $\Delta pksP$  strain (Figure 5E and F).

254

### 255 **The phagolysosomal ESCRT repair machinery is by DHN-melanin**

256 Recently, it was demonstrated that disruptions of endolysosomes can be repaired by the  
257 endosomal sorting complex required for transport (ESCRT) machinery (Jimenez et al.,  
258 2014, Skowyra et al., 2018). In *D. discoideum*, Vps32 is a homologue of the CHP4A, B,  
259 C proteins of the ESCRT-III complex in metazoa. The protein localizes to injuries at the  
260 plasma membrane and endomembranes (López-Jiménez et al., 2018). We  
261 hypothesized that damage due to conidial infection triggers the recruitment of this  
262 complex which can be measured by the use of a Vps32-GFP expressing cell line (Figure  
263 5G-H). Infection of this cell line with conidia of the  $\Delta pksP$  strain triggered the recruitment

264 of the ESCRT-III machinery to phagolysosomes in a time-dependent manner, with a  
265 maximum of 25% of Vps32-positive phagolysosomes after a long-term confrontation of  
266 5 h. In contrast, Vps32 was recruited to less than 5 % of wild-type conidia-containing  
267 phagolysosomes over the entire period. Pre-swollen conidia, which had lost their  
268 melanin coat at the the onset of germination, recruited higher levels of the Vps32 protein  
269 to the phagosome. Here, the numbers for Vps32-positive phagosomes exceeded 40 and  
270 60 % of for the wild type and the mutant (Figure 5I+J). We further substantiated the lack  
271 of ESCRT recruitment to damaged, wild-type conidia-containing phagosomes by  
272 combining all three reporters, *i.e.*, Vps32-expressing cells preloaded with dextrans of  
273 both molecular masses were infected with either wild-type or  $\Delta pksP$  conidia. Infections  
274 with the wild type lead to leaky phagosomes which were positive only for the 70-kDa-  
275 Dextran but devoid of the 4.4-kDa-Dextran and Vps32. Phagosomal damage, was also  
276 detected with  $\Delta pksP$  conidia, as seen by the selective loss of the 4.4-kDa-Dextran.  
277 However, Vps32 was effectively recruited to these phagosomes, indicating active repair.  
278 This conclusion was further supported by the observation that the smaller Dextran was  
279 at least partially retained in Vps32-positive phagosomes (Figure 6).How, DHN-melanin  
280 could directly affect Vps32 recruitment is unclear, but at least in *in vitro*, synthetic DHN-  
281 melanin and melanin ghosts were more efficiently degraded by H<sub>2</sub>O<sub>2</sub> at neutral pH,  
282 indicating that unknown degradation products of DHN-melanin could be present inside  
283 the phagolysosome (Figure S6).

284

### 285 **DHN-melanin attenuates killing by a fungivorous amoeba**

286 Although deformed or degraded fungal conidia after co-incubation of swollen spores with  
287 *D. discoideum* were occasionally observed after confrontation for 3 to 5 hours (Figure

288 S7 A+B), an assay for fungal viability did not reveal any significant killing of either wild  
289 type or melanin-deficient mutant by this model phagocyte (Figure S7C). In turn, the  
290 viability of *D. discoideum* was significantly affected after 24 h of an infection by the  
291 fungus at an MOI of 0.1, but the effects were not melanin-dependent (Figure S7D).  
292 Contrary to *D. discoideum*, other amoebae are specialized mycophagous predators, with  
293 *Protostelium aurantium* being able to internalize and intracellularly digest fungal conidia  
294 (Figure S8), or invade fungal hyphae (Radosa et al., 2019b). When confronted with the  
295 fungivorous amoeba *Protostelium aurantium*, melanin-deficient conidia were killed more  
296 efficiently than wild-type conidia. Comparably higher exposure of DHN-melanin on the  
297 surface of the conidia was previously shown for fungal strains lacking the gene encoding  
298 the main conidial hydrophobin RodA (Valsecchi et al., 2018), (Figure 7A). The survival of  
299 RodA-deficient conidia was even higher than that of wild-type conidia (Figure 7B+C),  
300 suggesting that DHN-melanin can serve a protective role against this fungivorous  
301 predator.

## 302 **Discussion**

303 As the environmental reservoir of *A. fumigatus* suggests that phagocytic interference *via*  
304 DHN-melanin could also serve a protective role outside the human host, we have used  
305 two amoeba models to follow the antagonistic interaction of *A. fumigatus* conidia with  
306 amoebae in real time. Conidia covered with the green pigment DHN-melanin were  
307 internalized at far lower rates than those lacking the pigment, despite high levels of initial  
308 attachment. Similar findings previously obtained with human macrophages showed that  
309 DHN-melanin of *A. fumigatus* interferes with their phagocytosis rates (reviewed in  
310 (Heinekamp et al., 2012). Such parallels might indicate that DHN-melanin serves as a  
311 protective pigment against a wide range of phagocytic cells, which may either belong to  
312 the innate immune defense of metazoa or be distant members within the highly diverse  
313 kingdom of amoebozoa.

314 We provided further evidence that the first intracellular processing steps in the amoeba,  
315 v-ATPase trafficking and acidification, are only marginally affected during *A. fumigatus*  
316 infection of *D. discoideum*. The dynamics of this phagosomal marker together with the *in*  
317 *silico* data of the MC simulation are in general agreement with previous studies for *D.*  
318 *discoideum* phagosome maturation (Carnell et al., 2011).

319 Our results on the initial maturation step of acidification in amoebae differ from findings  
320 reported for murine and human macrophages infected with *A. fumigatus* conidia. In  
321 macrophages, acidification of phagosomes containing was delayed by melanized  
322 conidia due to the interference of DHN-melanin with lipid rafts that are required for v-  
323 ATPase assembly (Schmidt et al., 2019). The defect in acidification seen for wild-type  
324 conidia in macrophages might thus be based on more specific effects on innate immune  
325 cells.



326 The amorphous structure of DHN-melanin and its degradation are still unknown,  
327 precluding most biochemical approaches to identify its molecular targets (Nosanchuk et  
328 al., 2015). Our *in vitro* results suggest that its degradation might be enhanced by ROS  
329 within neutral phagosomes, thereby aggravating its downstream effects on the host cell.  
330 Both a neutral to alkaline pH and the presence of ROS have long been known to be key  
331 mediators during the biochemical break-down of chemically diverse melanins  
332 (Korytowski and Sarna, 1990, Butler and Day, 1998).

333 Considering the wide environmental occurrence of the fungus, it is probable that DHN-  
334 melanin may have additional targets in metazoa when compared to amoebozoan  
335 phagocytes. For example, while the MelLec receptor only represents one member of the  
336 expanded C-type lectins in metazoa. This family of receptors is restricted to only a few,  
337 members in *D. discoideum*. Another possible reason for the difference in acidification of  
338 *A. fumigatus* conidia-containing phagosomes in amoebae and macrophages might be  
339 due to major differences in the phagosome maturation processes. In *D. discoideum*, we  
340 observed that CybA-mCherry, as a proxy for the NOX complex, is delivered to  
341 phagosomes at the onset of neutralization, suggesting that v-ATPase has been retrieved  
342 at this point. In classically polarized, pro-inflammatory human macrophages (M1), proton  
343 pumping and ROS production were found to coincide, thereby maintaining a neutral pH  
344 (Canton et al., 2014).

345 We demonstrated that melanized conidia resided in phagosomes of amoebae for a  
346 longer period of time than melanin-deficient conidia and that these phagolysosomes  
347 were leaky (Figure 8). Damage to the phagolysosomal membrane might be partially due  
348 to the intrinsic production of ROS and might be further enhanced by fungal mycotoxins,  
349 such as the spore-borne polyketide tryptacidin (Mattern et al., 2015). In *D. discoideum*

350 the ESCRT machinery is effectively recruited to damaged intracellular membranes, such  
351 as *Mycobacterium marinum*--containing vacuoles (Cardenal-Munoz et al., 2017, López-  
352 Jiménez et al., 2018). In mammalian cells, ESCRT-III recruitment to damaged plasma  
353 membranes and lysosomes was hypothesized to depend on the recognition of a local  
354 increase of  $Ca^{2+}$  by ALIX and/or ALG2 (Jimenez et al., 2014, Skowrya et al., 2018). In *D.*  
355 *discoideum*, ESCRT-III recruitment to sites of membrane damage appears to be  
356 independent of  $Ca^{2+}$ , but strongly depends on Tsg101 (López-Jiménez et al., 2018).  
357 While infection with non-melanized conidia ESCRT-III was recruited to phagosomes  
358 containing unmelanized conidia, this recruitment did not occur with melanized conidia  
359 despite similarly high levels of damage, indicating that this defect in recruitment might be  
360 a major cause of proton leakage. How DHN-melanin or its degradation products  
361 suppress the cell-autonomous repair machinery of the amoeba host is not clear, but  
362 previous observations found that conidia are able to germinate inside certain types of  
363 macrophages and amoeba (Schaffner et al., 1982, Van Waeyenberghe et al., 2013,  
364 Hillmann et al., 2015). It is likely that damage to the sealed phagolysosome might lead  
365 to an influx of nutrients and will thus help the fungus to establish a germination niche.  
366 Although this advantage may be restricted to non-specialized phagocytes that are  
367 unable to kill the fungus, we also found a protective role for DHN-melanin when  
368 encountering a fungivorous amoeba, demonstrating that surface exposure of DHN-  
369 melanin provides an overall selective advantage in phagocytic predator-prey interactions  
370 in environmental reservoirs.

## 371 **Materials and Methods**

### 372 **Strains and culture conditions**

373 All strains used in this work are listed in Table S1. *D. discoideum* cells were axenically  
374 grown in plastic petri dishes (94x16 mm, Greiner Bio-One, Austria) in HL5 medium  
375 (Formedium) supplemented with 1 % [w/v] glucose and with 10,000 U g/ml of penicillin  
376 and 10 mg/ml of streptomycin (7050218, Genaxxon bioscience) and was split every 2-3  
377 days before reaching confluency. *Protostelium aurantium* var. *fungivorum* (Hillmann et  
378 al., 2018) was grown in PBS (80 g l<sup>-1</sup> NaCl, 2 g l<sup>-1</sup> KCl, 26.8 g l<sup>-1</sup> Na<sub>2</sub>HPO<sub>4</sub> x 7 H<sub>2</sub>O, 2.4 g  
379 l<sup>-1</sup> KH<sub>2</sub>PO<sub>4</sub>, pH 6.6) with *Rhodotorula mucilaginosa* as a food source at 22°C. *Aspergillus*  
380 *fumigatus* strains were grown in Aspergillus Minimal Medium (AMM) or Czapek-Dox  
381 (CZD, Thermo Fisher Scientific, Germany) Medium at 37°C, supplemented with 1.5 %  
382 [w/v] agar for growth on solid media.

383

### 384 **Microscopy and image analysis**

385 Microscopy was carried out on an Axio Observer Spinning Disc Confocal Microscope  
386 (ZEISS) using ZEN Software 2.6 software. Fluorescent stains and proteins were excited  
387 using the 488 nm, 561 nm laser lines. Quantification of fluorescence intensity was  
388 performed using ImageJ (<https://imagej.nih.gov>).

389

### 390 **Resazurin based survival assay after amoeba predation**

391 A total of 1x10<sup>6</sup> conidia of *A. fumigatus* were placed in 96-well tissue culture in 100µl  
392 CZD media. Conidia were confronted with *P. aurantium* directly (resting conidia) or after  
393 preincubation at 37°C for 6 h (swollen) MOI 10. *P. aurantium* was collected from pre-  
394 cultures on *R. mucilaginosa*. The liquid medium was aspirated from the plate and

395 washed two times with PPB to remove residual yeast cells. Trophozoites were added at  
396 prey-predator ratios 10:1, and incubated at 22°C for 18h. Then, the plate was  
397 transferred to 37°C for 1h in order to kill the amoeba and induce fungal growth.  
398 Resazurin (R7017, Sigma-Aldrich, Taufkirchen, Germany) 0.002% [w/v] was added to  
399 quantify the amount of fungal growth to each well in real time as fluorescence,  
400 measured in intervals of 30 min over 80 h at  $\lambda_{\text{ex}}$  532 nm/ $\lambda_{\text{em}}$  582 nm using an Infinite  
401 M200 Pro fluorescence plate reader (Tecan, Männedorf, Switzerland).

402

### 403 **Measurement of phagosome acidification**

404 *D. discoideum* cells at concentrations of  $10^6 \text{ ml}^{-1}$  were axenically grown as an adherent  
405 culture in ibidi® dishes (ibidi, Gräfelfing, Germany) in a total volume of 2 ml HL5  
406 supplemented with 1% [w/v] glucose. To synchronize the physiological status of the *D.*  
407 *discoideum* cells, the plates were cooled down to 4°C 10 minutes (before adding  
408 conidia) on an ice-cold metal plate. Conidia were stained with FITC and CF594  
409 fluorophores for 10 min and washed two times with PBS. Then, amoebae were infected  
410 with conidia at an MOI of 10 and briefly centrifuged (500 rpm, 2min). Excess media was  
411 aspirated and a 1% [w/v] agarose sheet was placed on top of cells (1.5x1.5 cm). Then,  
412 cells were imaged at 3 to 1 min frame intervals, for up to 4 hrs with a spinning disc  
413 confocal system (Axio Observer with a Cell Observer Spinning Disc unit, ZEISS) using  
414 the 63 × oil objective. Image processing and quantification of fluorescence intensity was  
415 performed with ImageJ. Under infectious conditions, only cells containing conidia were  
416 considered for quantification. The GraphPad5 Prism software was used to perform  
417 statistical tests and to plot graphs.

418

419 **Calibration curve for the acidification measurements**

420 HL5 media supplemented with 1% [w/v] glucose were buffered to pH 3.5 to 8.0. *A.*  
421 *fumigatus* resting conidia of the wild type or  $\Delta pksP$  strain were stored in buffered media.  
422 For pH determinations, the integrated density of at least 10 conidia was measured with  
423 ImageJ. Then average log of these values were plotted on the calibration curve graph.  
424 In order to determine pH on the sample image the integrated density were back  
425 calculated from the calibration graph.

426

427 **Visualisation of ROS generation in *D. discoideum***

428 Amoebae were infected in 8-well Ibidi dish with resting conidia of *A. fumigatus* at an MOI  
429 of 10. After 2 hours of co-incubation, the superoxide indicator dihydroethidium (DHE,  
430 Thermo Fisher Scientific) was added to the wells up to a final concentration of 10  $\mu\text{M}$ .  
431 After 10min sample was imaged with a red and blue laser. Experiments were performed  
432 in three biological replicates.

433

434 **Co-incubation with Dextran**

435 *D. discoideum* cells were incubated with dextran at an MW 70,000 (labelled with RITC,  
436 R9379, Sigma-Aldrich), dextran at an MW 4,400 (also labelled with TRITC, T1037,  
437 Sigma-Aldrich) and blue dextran MW 5,000 (90008, Sigma-Aldrich). Final concentrations  
438 were at 0.5 mg ml<sup>-1</sup> (70 kDa Dextran), or 1.5 mg ml<sup>-1</sup>, (4.4 and 5 kDa Dextran). After 2 h  
439 the cells were washed with fresh media to remove extracellular dextran and were  
440 infected with fungal conidia. Dextran loaded lysosomes would fuse with conidia  
441 containing phagosomes, thus creating fluorescent rings around the ingested conidia.

442 Damage to the plasma membrane was visible due to selective diffusion of the smaller  
443 dextrans into the cytosol.

444

#### 445 **Computational modeling**

446 A Monte-Carlo computational model was used to assess the population-wide distribution  
447 of acidic phagosomes during infections with conidia of the wild type and  $\Delta pksP$ .  
448 Statistical differences were calculated with a Bonferroni post hoc test after two-way  
449 ANOVA ( $P < 0.0001$ ). This simulation performs a risk analysis by building models taking  
450 into account a range of values obtained in previous experiments (such as phagocytosis  
451 rate, the average time of the conidia inside of acidified phagosome, time of exocytosis for  
452 each fungal cell line). It then repeatedly executes the calculation, each time using a  
453 different set of random values from the probability functions. The generated simulations  
454 produce distributions of possible outcomes of the infection for the whole amoeba  
455 population for the each fungal cell line. The simulation code is available online at  
456 <https://github.com/devlxf/FungiSim>.

457

#### 458 **Synthetic polymerization of 1,8-DHN-melanin**

459 Melanin ghosts were prepared as described by (Youngchim et al., 2004) in  
460 concentration of  $10^9$  particles  $\text{ml}^{-1}$ . Synthetic melanin was polymerized spontaneously  
461 from 1,8-dihydroxynaphthalene (Sigma) over three days in PPB buffer in 48-well plate.  
462 Then,  $\text{H}_2\text{O}_2$  were added in various concentrations to the wells. The plates were imaged  
463 after two days.

## 464 **Acknowledgments**

465 We thank Jean Paul Latgé, Emilia Mellado and Axel A. Brakhage for the supply of *A.*  
466 *fumigatus* strains. This work was supported by a grant of the European Social Fund ESF  
467 “Europe for Thuringia” (2015FGR0097 to F.H.) and a grant from the German Research  
468 Foundation (DFG, HI 1574/2-1). I.F. was supported by an EMBO Short-Term Fellowship  
469 (7020). Work in the T.S. laboratory was supported by a grant from the Swiss National  
470 Science Foundation (310030\_169386).

## 471 **Author Contributions**

472 Conceptualization, I.F., T.S. and F.H.; Methodology, I.F. and J.D.D.; Software, A.F.;  
473 Formal Analysis, I.F.; Investigation, I.F.; Resources, T.S. and F.H.; Writing – Original  
474 Draft, I.F. and F.H.; Writing – Review & Editing J.D.D., T.S. and F.H.; Visualization, I.F.;  
475 Supervision, T.S. and F.H.; Funding Acquisition, I.F., T.S. and F.H.

## 476 **Declaration of Interests**

477 The authors declare no competing interests.

## 478 References

- 479 AKOUMIANAKI, T., KYRMIZI, I., VALSECCHI, I., GRESNIGT, M. S., SAMONIS, G., DRAKOS, E., BOUMPAS, D.,  
480 MUSZKIETA, L., PREVOST, M. C., KONTOYIANNIS, D. P., CHAVAKIS, T., NETEA, M. G., VAN DE  
481 VEERDONK, F. L., BRAKHAGE, A. A., EL-BENNA, J., BEAUVAIS, A., LATGE, J. P. & CHAMILOS, G.  
482 2016. Aspergillus Cell Wall Melanin Blocks LC3-Associated Phagocytosis to Promote  
483 Pathogenicity. *Cell Host Microbe*, 19, 79-90.
- 484 AMIN, S., THYWISSEN, A., HEINEKAMP, T., SALUZ, H. P. & BRAKHAGE, A. A. 2014. Melanin dependent  
485 survival of Aspergillus fumigatus conidia in lung epithelial cells. *Int J Med Microbiol*, 304, 626-36.
- 486 BONGOMIN, F., GAGO, S., OLADELE, R. O. & DENNING, D. W. 2017. Global and Multi-National Prevalence  
487 of Fungal Diseases-Estimate Precision. *J Fungi (Basel)*, 3.
- 488 BOSMANI, C., BACH, F., LEUBA, F., HANNA, N., BURDET, F., PAGNI, M., HAGEDORN, M. & SOLDATI, T.  
489 2019. Dictyostelium discoideum flotillin homologues are essential for phagocytosis and  
490 participate in plasma membrane recycling and lysosome biogenesis. *bioRxiv preprint*.
- 491 BRAKHAGE, A. A. & LANGFELDER, K. 2002. Menacing mold: the molecular biology of Aspergillus  
492 fumigatus. *Annu Rev Microbiol*, 56, 433-55.
- 493 BROWN, G. D., DENNING, D. W., GOW, N. A., LEVITZ, S. M., NETEA, M. G. & WHITE, T. C. 2012. Hidden  
494 killers: human fungal infections. *Sci Transl Med*, 4, 165rv13.
- 495 BUTLER, M. J. & DAY, A. W. 1998. Destruction of Fungal Melanins by Ligninases of *Phanerochaete*  
496 *chrysosporium* and Other White Rot Fungi. *International Journal of Plant Sciences*, 159,  
497 989-995.
- 498 CANTON, J., KHEZRI, R., GLOGAUER, M. & GRINSTEIN, S. 2014. Contrasting phagosome pH regulation and  
499 maturation in human M1 and M2 macrophages. *Molecular Biology of the Cell*, 25, 3330-3341.
- 500 CARDENAL-MUNOZ, E., ARAFAH, S., LOPEZ-JIMENEZ, A. T., KICKA, S., FALAISE, A., BACH, F., SCHAAD, O.,  
501 KING, J. S., HAGEDORN, M. & SOLDATI, T. 2017. Mycobacterium marinum antagonistically  
502 induces an autophagic response while repressing the autophagic flux in a TORC1- and ESX-1-  
503 dependent manner. *PLoS Pathog*, 13, e1006344.
- 504 CARNELL, M., ZECH, T., CALAMINUS, S. D., URA, S., HAGEDORN, M., JOHNSTON, S. A., MAY, R. C.,  
505 SOLDATI, T., MACHESKY, L. M. & INSALL, R. H. 2011. Actin polymerization driven by WASH causes  
506 V-ATPase retrieval and vesicle neutralization before exocytosis. *J Cell Biol*, 193, 831-9.
- 507 CASADEVALL, A., FU, M. S., GUIMARAES, A. J. & ALBUQUERQUE, P. 2019. The 'Amoeboid Predator-Fungal  
508 Animal Virulence' Hypothesis. *J Fungi (Basel)*, 5.
- 509 CHAI, L. Y., NETEA, M. G., SUGUI, J., VONK, A. G., VAN DE SANDE, W. W., WARRIS, A., KWON-CHUNG, K. J.  
510 & KULLBERG, B. J. 2010. Aspergillus fumigatus conidial melanin modulates host cytokine  
511 response. *Immunobiology*, 215, 915-20.
- 512 CLARKE, M., KOHLER, J., ARANA, Q., LIU, T., HEUSER, J. & GERISCH, G. 2002. Dynamics of the vacuolar  
513 H(+)-ATPase in the contractile vacuole complex and the endosomal pathway of Dictyostelium  
514 cells. *J Cell Sci*, 115, 2893-905.
- 515 CLARKE, M., MADDERA, L., ENGEL, U. & GERISCH, G. 2010. Retrieval of the vacuolar H-ATPase from  
516 phagosomes revealed by live cell imaging. *PLoS One*, 5, e8585.
- 517 COSSON, P. & SOLDATI, T. 2008. Eat, kill or die: when amoeba meets bacteria. *Curr Opin Microbiol*, 11,  
518 271-6.
- 519 DUNN, J. D., BOSMANI, C., BARISCH, C., RAYKOV, L., LEFRANCOIS, L. H., CARDENAL-MUNOZ, E., LOPEZ-  
520 JIMENEZ, A. T. & SOLDATI, T. 2018. Eat Prey, Live: Dictyostelium discoideum As a Model for Cell-  
521 Autonomous Defenses. *Front Immunol*, 8, 1906.
- 522 FLANNAGAN, R. S., COSIO, G. & GRINSTEIN, S. 2009. Antimicrobial mechanisms of phagocytes and  
523 bacterial evasion strategies. *Nat Rev Microbiol*, 7, 355-66.



- 524 FRIEDRICH, N., HAGEDORN, M., SOLDATI-FAVRE, D. & SOLDATI, T. 2012. Prison break: pathogens'  
525 strategies to egress from host cells. *Microbiol Mol Biol Rev*, 76, 707-20.
- 526 GOPALDASS, N., PATEL, D., KRATZKE, R., DIECKMANN, R., HAUSHERR, S., HAGEDORN, M., MONROY, R.,  
527 KRUGER, J., NEUHAUS, E. M., HOFFMANN, E., HILLE, K., KUZNETSOV, S. A. & SOLDATI, T. 2012.  
528 Dynamin A, Myosin IB and Abp1 couple phagosome maturation to F-actin binding. *Traffic*, 13,  
529 120-30.
- 530 HEINEKAMP, T., THYWISSEN, A., MACHELEIDT, J., KELLER, S., VALIANTE, V. & BRAKHAGE, A. A. 2012.  
531 *Aspergillus fumigatus* melanins: interference with the host endocytosis pathway and impact on  
532 virulence. *Front Microbiol*, 3, 440.
- 533 HILLMANN, F., FORBES, G., NOVOHRADSKA, S., FERLING, I., RIEGE, K., GROTH, M., WESTERMANN, M.,  
534 MARZ, M., SPALLER, T., WINCKLER, T., SCHAAP, P. & GLOCKNER, G. 2018. Multiple Roots of  
535 Fruiting Body Formation in Amoebozoa. *Genome Biol Evol*, 10, 591-606.
- 536 HILLMANN, F., NOVOHRADSKA, S., MATTERN, D. J., FORBERGER, T., HEINEKAMP, T., WESTERMANN, M.,  
537 WINCKLER, T. & BRAKHAGE, A. A. 2015. Virulence determinants of the human pathogenic fungus  
538 *Aspergillus fumigatus* protect against soil amoeba predation. *Environ Microbiol*, 17, 2858-69.
- 539 HOGAN, D. & WHEELER, R. T. 2014. The complex roles of NADPH oxidases in fungal infection. *Cellular*  
540 *microbiology*, 16, 1156-1167.
- 541 JAHN, B., LANGFELDER, K., SCHNEIDER, U., SCHINDEL, C. & BRAKHAGE, A. A. 2002. PKSP-dependent  
542 reduction of phagolysosome fusion and intracellular kill of *Aspergillus fumigatus* conidia by  
543 human monocyte-derived macrophages. *Cell Microbiol*, 4, 793-803.
- 544 JIMENEZ, A. J., MAIURI, P., LAFAURIE-JANVORE, J., DIVOUX, S., PIEL, M. & PEREZ, F. 2014. ESCRT  
545 machinery is required for plasma membrane repair. *Science*, 343, 1247136.
- 546 KORYTOWSKI, W. & SARNA, T. 1990. Bleaching of melanin pigments. Role of copper ions and hydrogen  
547 peroxide in autooxidation and photooxidation of synthetic dopa-melanin. *J Biol Chem*, 265,  
548 12410-6.
- 549 LARDY, B., BOF, M., AUBRY, L., PACLET, M. H., MOREL, F., SATRE, M. & KLEIN, G. 2005. NADPH oxidase  
550 homologs are required for normal cell differentiation and morphogenesis in *Dictyostelium*  
551 *discoideum*. *Biochim Biophys Acta*, 1744, 199-212.
- 552 LIU, T. & CLARKE, M. 1996. The vacuolar proton pump of *Dictyostelium discoideum*: molecular cloning  
553 and analysis of the 100 kDa subunit. *J Cell Sci*, 109 ( Pt 5), 1041-51.
- 554 LÓPEZ-JIMÉNEZ, A. T., CARDENAL-MUÑOZ, E., LEUBA, F., GERSTENMAIER, L., HAGEDORN, M., KING, J. S.  
555 & SOLDATI, T. 2018. ESCRT and autophagy cooperate to repair ESX-1-dependent damage to the  
556 *Mycobacterium*-containing vacuole. *bioRxiv preprint*
- 557 LUTHER, K., TOROSANTUCCI, A., BRAKHAGE, A. A., HEESEMANN, J. & EBEL, F. 2007. Phagocytosis of  
558 *Aspergillus fumigatus* conidia by murine macrophages involves recognition by the dectin-1 beta-  
559 glucan receptor and Toll-like receptor 2. *Cell Microbiol*, 9, 368-81.
- 560 MATTERN, D. J., SCHOELER, H., WEBER, J., NOVOHRADSKA, S., KRAIBOOJ, K., DAHSE, H. M., HILLMANN,  
561 F., VALIANTE, V., FIGGE, M. T. & BRAKHAGE, A. A. 2015. Identification of the antiphagocytic  
562 trypanacidin gene cluster in the human-pathogenic fungus *Aspergillus fumigatus*. *Appl Microbiol*  
563 *Biotechnol*, 99, 10151-61.
- 564 NOSANCHUK, J. D., STARK, R. E. & CASADEVALL, A. 2015. Fungal Melanin: What do We Know About  
565 Structure? *Front Microbiol*, 6, 1463.
- 566 RADOSA, S., FERLING, I., SPRAGUE, J. L., WESTERMANN, M. & HILLMANN, F. 2019a. The different  
567 morphologies of yeast and filamentous fungi trigger distinct killing and feeding mechanisms in a  
568 fungivorous amoeba. *Environ Microbiol*, 13, 1462-2920.
- 569 RADOSA, S., FERLING, I., SPRAGUE, J. L., WESTERMANN, M. & HILLMANN, F. 2019b. The different  
570 morphologies of yeast and filamentous fungi trigger distinct killing and feeding mechanisms in a  
571 fungivorous amoeba. *Environ Microbiol*, 21, 1809-1820.

- 572 SCHAFFNER, T., KELLER, H. U., HESS, M. W. & COTTIER, H. 1982. Macrophage functions in antimicrobial  
573 defense. *Klin Wochenschr*, 60, 720-6.
- 574 SCHMIDT, F., THYWIBEN, A., RÖCKER, M., CUNHA, C., CSERESNYÉS, Z., SCHMIDT, H., GALIANI, S., GRÄLER,  
575 M. H., CHAMILOS, G., LACERDA, J. F., CAMPOS, A., EGGELING, C., FIGGE, M. T., HEINEKAMP, T.,  
576 FILLER, S. G., CARVALHO, A. & BRAKHAGE, A. A. 2019. Flotillin-dependent lipid-raft microdomains  
577 are required for functional phagolysosomes against fungal infections. *bioRxiv preprint*.
- 578 SKOWYRA, M. L., SCHLESINGER, P. H., NAISMITH, T. V. & HANSON, P. I. 2018. Triggered recruitment of  
579 ESCRT machinery promotes endolysosomal repair. *Science*, 360.
- 580 SLESIONA, S., GRESSLER, M., MIHLAN, M., ZAEHLE, C., SCHALLER, M., BARZ, D., HUBE, B., JACOBSEN, I. D.  
581 & BROCK, M. 2012. Persistence versus escape: *Aspergillus terreus* and *Aspergillus fumigatus*  
582 employ different strategies during interactions with macrophages. *PLoS One*, 7, e31223.
- 583 STAPPERS, M. H. T., CLARK, A. E., AIMANIANDA, V., BIDULA, S., REID, D. M., ASAMAPHAN, P., HARDISON,  
584 S. E., DAMBUZA, I. M., VALSECCHI, I., KERSCHER, B., PLATO, A., WALLACE, C. A., YUECEL, R.,  
585 HEBECKER, B., DA GLORIA TEIXEIRA SOUSA, M., CUNHA, C., LIU, Y., FEIZI, T., BRAKHAGE, A. A.,  
586 KWON-CHUNG, K. J., GOW, N. A. R., ZANDA, M., PIRAS, M., ZANATO, C., JAEGER, M., NETEA, M.  
587 G., VAN DE VEERDONK, F. L., LACERDA, J. F., CAMPOS, A., CARVALHO, A., WILLMENT, J. A.,  
588 LATGE, J. P. & BROWN, G. D. 2018. Recognition of DHN-melanin by a C-type lectin receptor is  
589 required for immunity to *Aspergillus*. *Nature*, 555, 382-386.
- 590 THYWISSEN, A., HEINEKAMP, T., DAHSE, H. M., SCHMALER-RIPCKE, J., NIETZSCHE, S., ZIPFEL, P. F. &  
591 BRAKHAGE, A. A. 2011. Conidial Dihydroxynaphthalene Melanin of the Human Pathogenic  
592 Fungus *Aspergillus fumigatus* Interferes with the Host Endocytosis Pathway. *Front Microbiol*, 2,  
593 96.
- 594 VALSECCHI, I., DUPRES, V., MICHEL, J. P., DUCHATEAU, M., MATONDO, M., CHAMILOS, G., SAVEANU, C.,  
595 GUIJARRO, J. I., AIMANIANDA, V., LAFONT, F., LATGE, J. P. & BEAUVAIS, A. 2018. The puzzling  
596 construction of the conidial outer layer of *Aspergillus fumigatus*. *Cell Microbiol*, e12994.
- 597 VAN WAEYENBERGHE, L., BARE, J., PASMANS, F., CLAEYS, M., BERT, W., HAESBROUCK, F., HOUF, K. &  
598 MARTEL, A. 2013. Interaction of *Aspergillus fumigatus* conidia with *Acanthamoeba castellanii*  
599 parallels macrophage-fungus interactions. *Environ Microbiol Rep*, 5, 819-24.
- 600 VOLLING, K., THYWISSEN, A., BRAKHAGE, A. A. & SALUZ, H. P. 2011. Phagocytosis of melanized  
601 *Aspergillus* conidia by macrophages exerts cytoprotective effects by sustained PI3K/Akt  
602 signalling. *Cell Microbiol*, 13, 1130-48.
- 603 WATKINS, R. A., ANDREWS, A., WYNN, C., BARISCH, C., KING, J. S. & JOHNSTON, S. A. 2018. *Cryptococcus*  
604 *neoformans* Escape From *Dictyostelium Amoeba* by Both WASH-Mediated Constitutive  
605 Exocytosis and Vomocytosis. *Front Cell Infect Microbiol*, 8, 108.
- 606 YOUNGCHIM, S., MORRIS-JONES, R., HAY, R. J. & HAMILTON, A. J. 2004. Production of melanin by  
607 *Aspergillus fumigatus*. *J Med Microbiol*, 53, 175-81.

608

609

# Figure 1

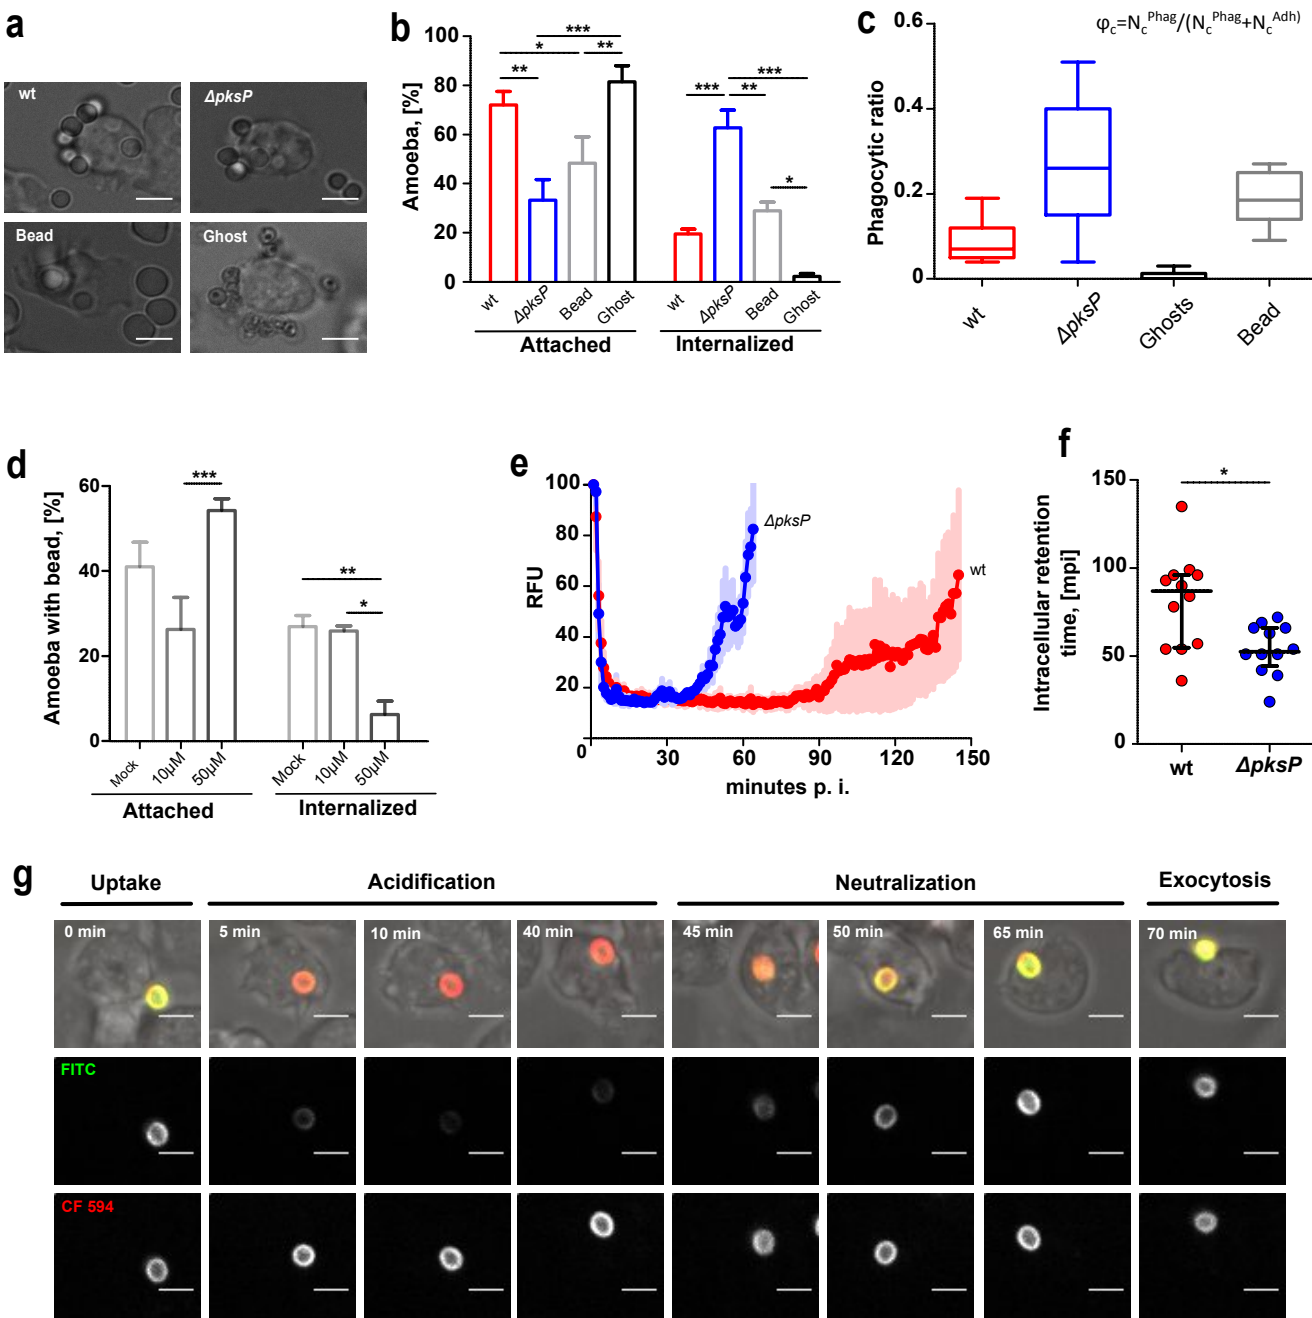

**Fig 1.** Phagocytosis of *Aspergillus fumigatus* conidia by *Dictyostelium discoideum*. **a** Resting conidia of the wild type (wt) or the melanin-deficient strain of *A. fumigatus* ( $\Delta pksP$ ) were added to *D. discoideum* at MOIs of 5. Silica beads (Bead) and melanin ghosts (Ghost) were added to the amoebae at the same MOI. Images were captured after 1 h of co-incubation. The scale bar is 5  $\mu$ m. **b** Cells with phagocytic and attachment events were quantified from images captured at 1 h p. i. The bars represent the mean and SEM from three independent experiments, with  $n=100$  for each experiment. Statistical differences were calculated with a Bonferroni posttest after a two-way ANOVA with asterisks indicating significance (\* $p < 0.05$ ; \*\* $p < 0.01$ ; \*\*\* $p < 0.001$ ). **c** Phagocytic ratio for *A. fumigatus* conidia, silica beads and melanin ghosts. **d** Wild type amoeba were exposed to silicon beads in the presence of 10 or 50  $\mu$ M of 1,8-DHN. Imaging and quantification were carried out as in **b**. **e-g** Amoebae were infected with resting conidia of the wild type or the  $\Delta pksP$  strain pre-stained with the pH-sensitive fluorophore (FITC) and the reference fluorophore (CF594) for real-time measurements of acidification and residence time in the amoeba. **e** Timeline of FITC derived fluorescence intensity indicating pH variations at the conidial surface during phagocytosis. **f** The intracellular retention time of conidia inside of *D. discoideum*. Statistical differences were calculated with a t-test. **g** Time-lapse illustration of major steps during the phagocytic cycle for resting conidia of the  $\Delta pksP$  mutant.

## Figure 2

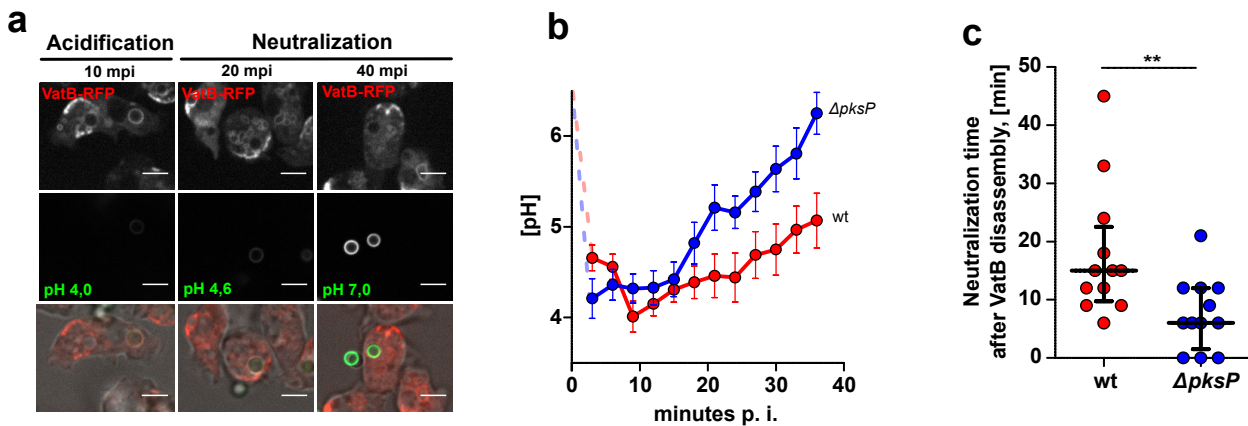

**Fig 2.** v-ATPase assembly and phagosomal acidification during conidial infection. **a** Representative images of different stages of phagosome maturation in VatB-RFP expressing cells infected with FITC stained  $\Delta pksP$  conidia. Scale bar is  $5\mu\text{m}$ . **b** Kinetics of phagosomal pH in VatB-RFP expressing cells infected with resting conidia. Twelve independent movies were taken for each fungal strain. Dots and error bars indicate the Mean and SE respectively. **c** Phagosomal neutralization time (pH 6.0) after VatB disassembly from the phagosomal surface. Statistical differences were calculated with a Student's t-test with  $P=0.0066$

# Figure 3

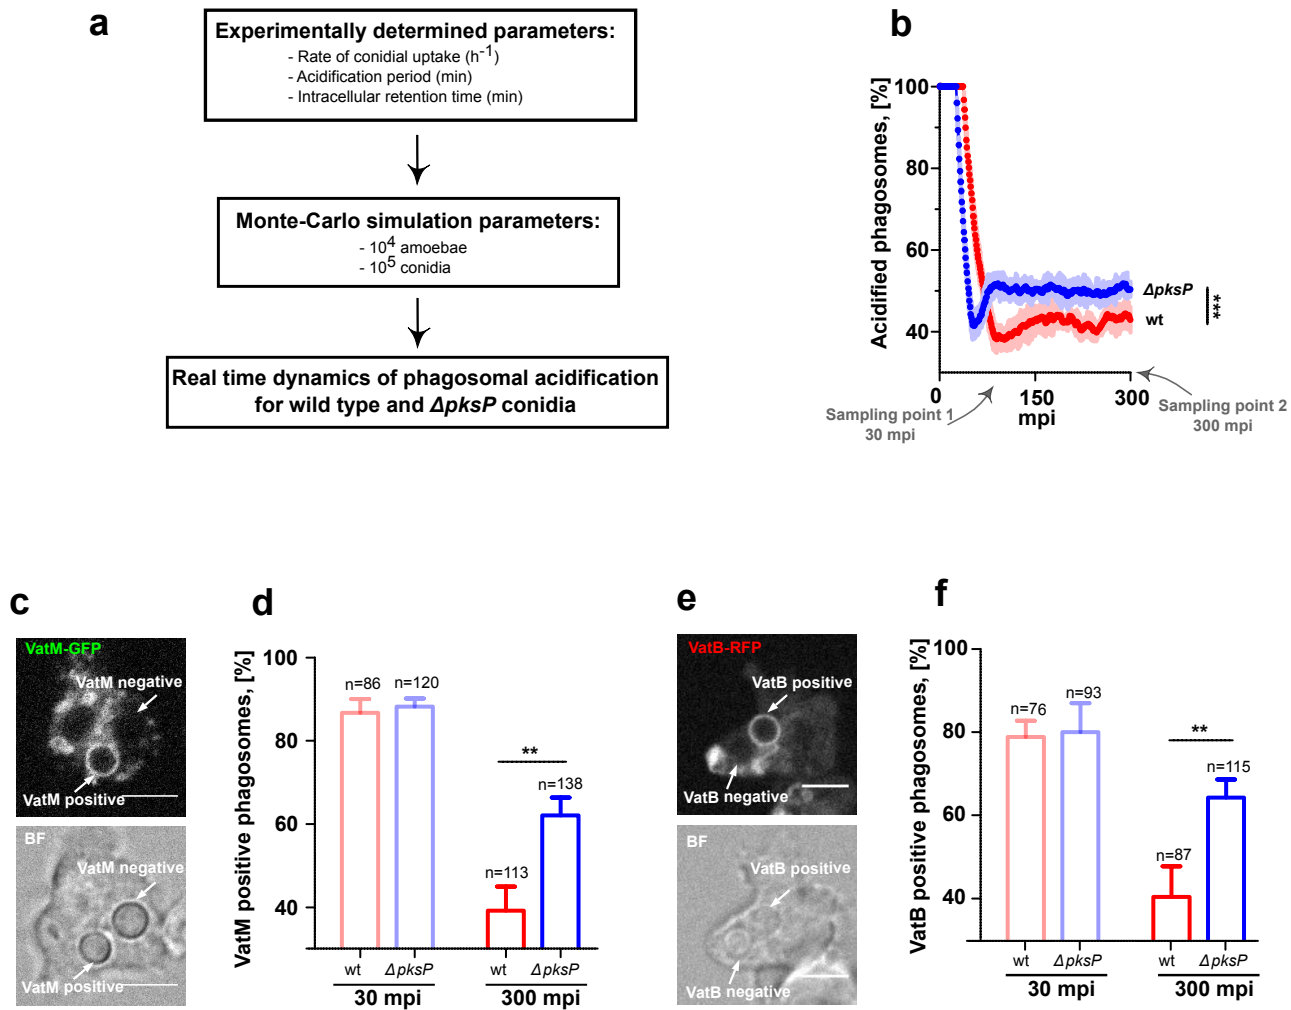

**Fig 3.** Quantification of number acidified phagosomes in the whole amoeba population. **a** Setup for the computational simulation of population dynamics based on experimentally determined parameters in single-cell analyses **b** Percentage of acidic phagosomes in the population of  $10^4$  amoeba infected with wild type and  $\Delta pksP$  conidia at an MOI of 10. Statistical differences were calculated with a Bonferroni post-hoc test after a two-way ANOVA ( $p < 0.0001$ ). **c, e** Representative images of VatM-GFP localization after 30 min p. i. (**c**) and VatB-RFP localization after 300 min p. i. (**e**) The scale bar is 5  $\mu m$ . **d, f** Percentage of VatM-GFP (**e**) and VatB-RFP (**f**) positive phagosomes after 30 and 300 min p. i. Experiments were performed in 3 biological replicates. Statistical differences were calculated with t-test with  $P=0.0053$  and  $P=0.0085$  for (**d**) and (**f**), respectively.

# Figure 4.

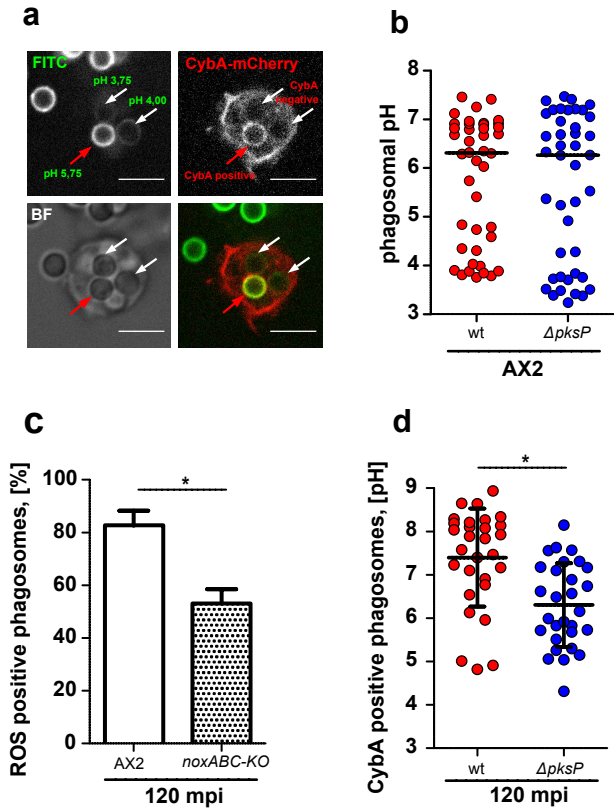

**Fig 4.** NADPH oxidase trafficking follows phagosome neutralization. **a** Representative image of *D. discoideum* expressing CybA-mCherry after 1 h of infection with FITC stained conidia of the wild type to assess the phagosomal pH and NADPH oxidase activity simultaneously. The scale bar is 5  $\mu$ m. **b** FITC based pH measurement of phagosomes 1 h p. i. Experiments were performed in 3 biological replicates and statistical differences were calculated with a Bonferroni post-hoc test after a two-way ANOVA. **c** DHE based quantification of ROS in phagosomes of wild type *D. discoideum* and mutant lacking all three nox genes. Experiments were performed in 3 biological replicates. Statistical differences were calculated with the t-test. **d** FITC based pH measurement of infected CybA-mCherry-positive phagosomes 2 h p. i. Experiments were performed in 3 biological replicates. Statistical differences were calculated with a t-test.

**Figure 5.**

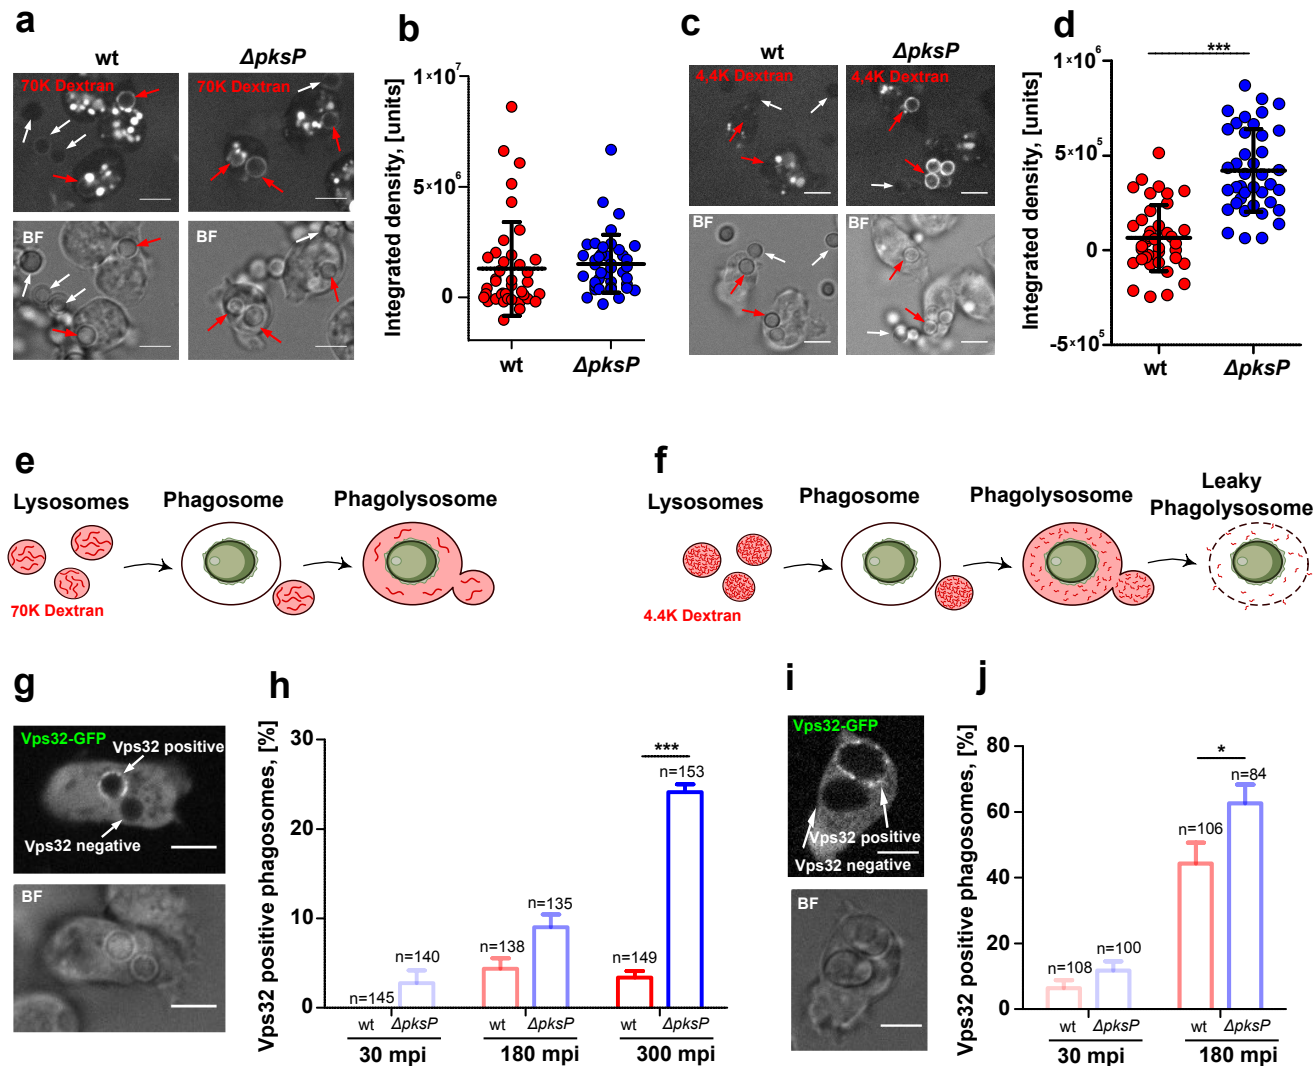

**Fig 5.** Dextran leakage and Vps32 recruitment at conidia containing phagolysosomes. **a, c** Cells of *D. discoideum* were loaded with RITC-dextran at a molecular weight of 70,000 Da (**a**) or 4,400 Da (**c**) and subsequently infected with *A. fumigatus* conidia. Images were captured after 300 mpi. Internalized conidia and free conidia are indicated by red and white arrows, respectively. **b, d** Quantification of RITC fluorescence of the two dextrans (B, 70,000 and C, 4,400) as integrated density in conidia containing phagosomes. Values were normalized by background subtraction of free conidia. Images were captured after 300 mpi. Data are based on 3 biological replicates with statistical differences calculated in a one way ANOVA with  $p < 0.0001$ . **e, f** Schematic representation of size discriminated leakage of dextran from phagolysosomes. **g, i** Vps32-GFP-expressing cells were infected with dormant (**g**) or swollen conidia (**i**) at an MOI of 10 and representative images from 180 m. p. i. are shown. **h, j** Quantification of Vps32-GFP localization to conidia containing phagosomes. Statistical differences were calculated with a Bonferroni post-hoc test after a two-way ANOVA with asterisks stating significance with \* $p < 0.05$ , \*\* $p < 0.01$ , and \*\*\* $p < 0.001$ ). Scale bars are 5  $\mu$ m.

# Figure 6.

**a**

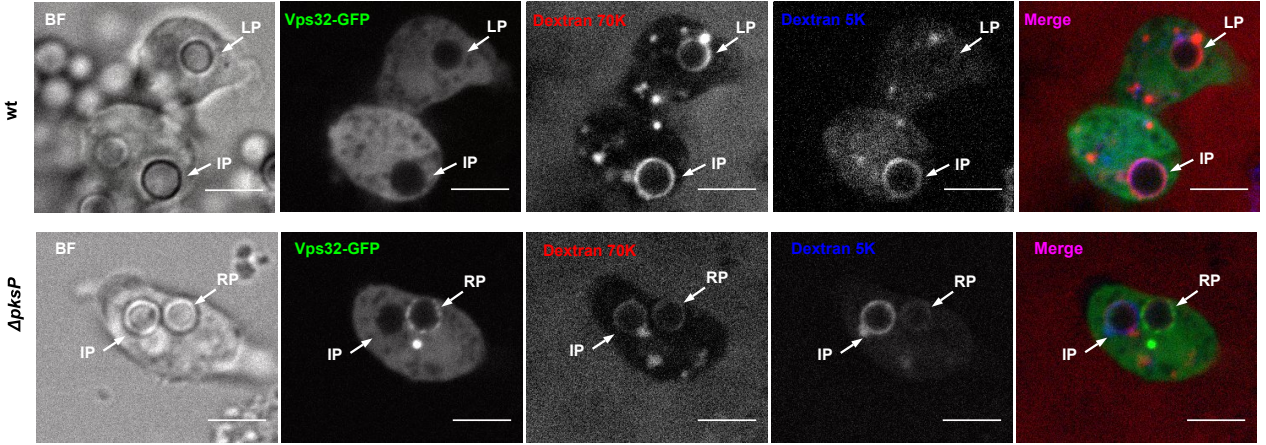

**b**

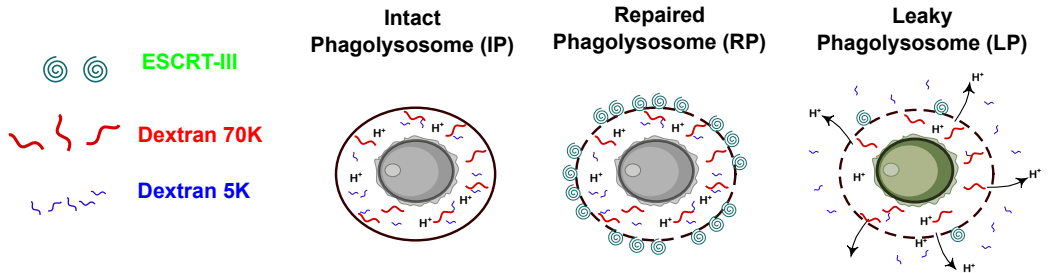

**Fig 6.** Vps32 is absent from damaged phagolysosomes containing DHN-melanized conidia. **a** Vps32-GFP-expressing cells of *D. discoideum* were first loaded with RITC-dextran of 70,000 Da and blue-dextran of 5,000 Da simultaneously and subsequently infected with dormant conidia of the wild type or  $\Delta pksP$ . Scale bars are 5  $\mu\text{m}$ . **b** Schematic illustration of the experimental results.



Figure 7

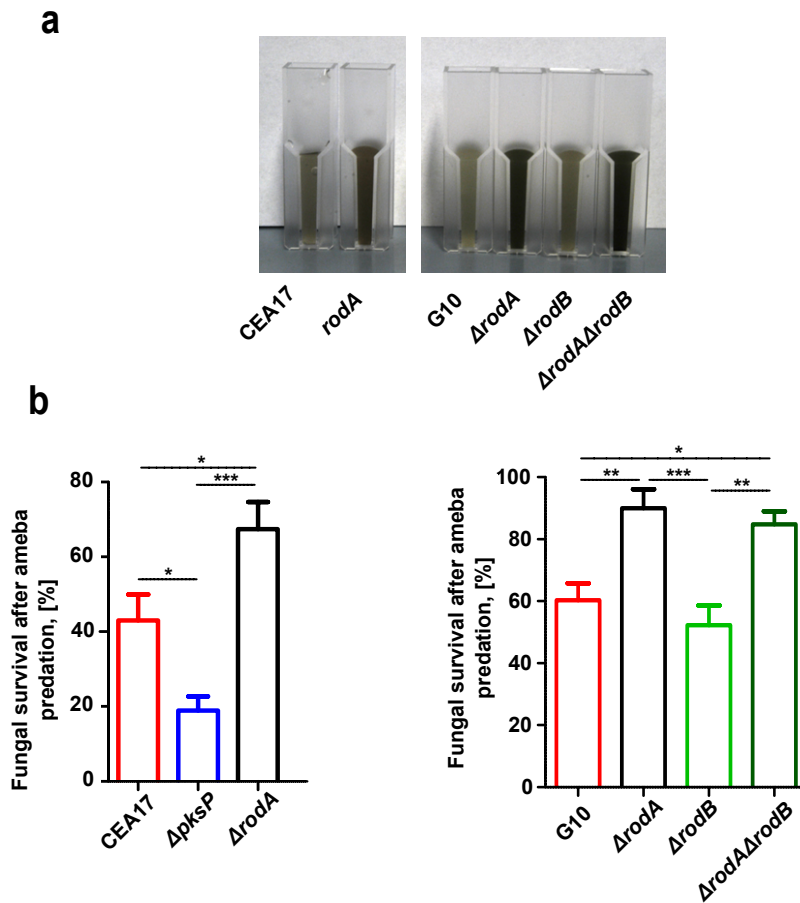

**Fig 7.** Viability of swollen conidia of *Aspergillus fumigatus* after a confrontation with the fungivorous amoeba *Protostelium aurantium*. **a** Suspensions of  $10^9$  conidia of *A. fumigatus* strains showing different levels of DHN-melanin exposure. CEA17 and G10 represent wild type like strains,  $\Delta rodA$ ,  $\Delta rodB$ , and  $\Delta rodA\Delta rodB$  indicate deletion mutants for genes encoding surface hydrophobins. **b** Viability of conidia after *P.aurantium* predation. Fungal survival was determined from Resazurin based measurements of fungal growth following confrontations with the *P.aurantium* at an MOI of 10. Fungal survival is expressed as a mean and SEM from three independent experiments. Statistical differences were calculated with a Bonferroni post-test after a two-way ANOVA with significance shown as \*  $p < 0.05$ ; \*\*  $p < 0.01$ ; \*\*\*  $p < 0.001$ .

**Figure 8**

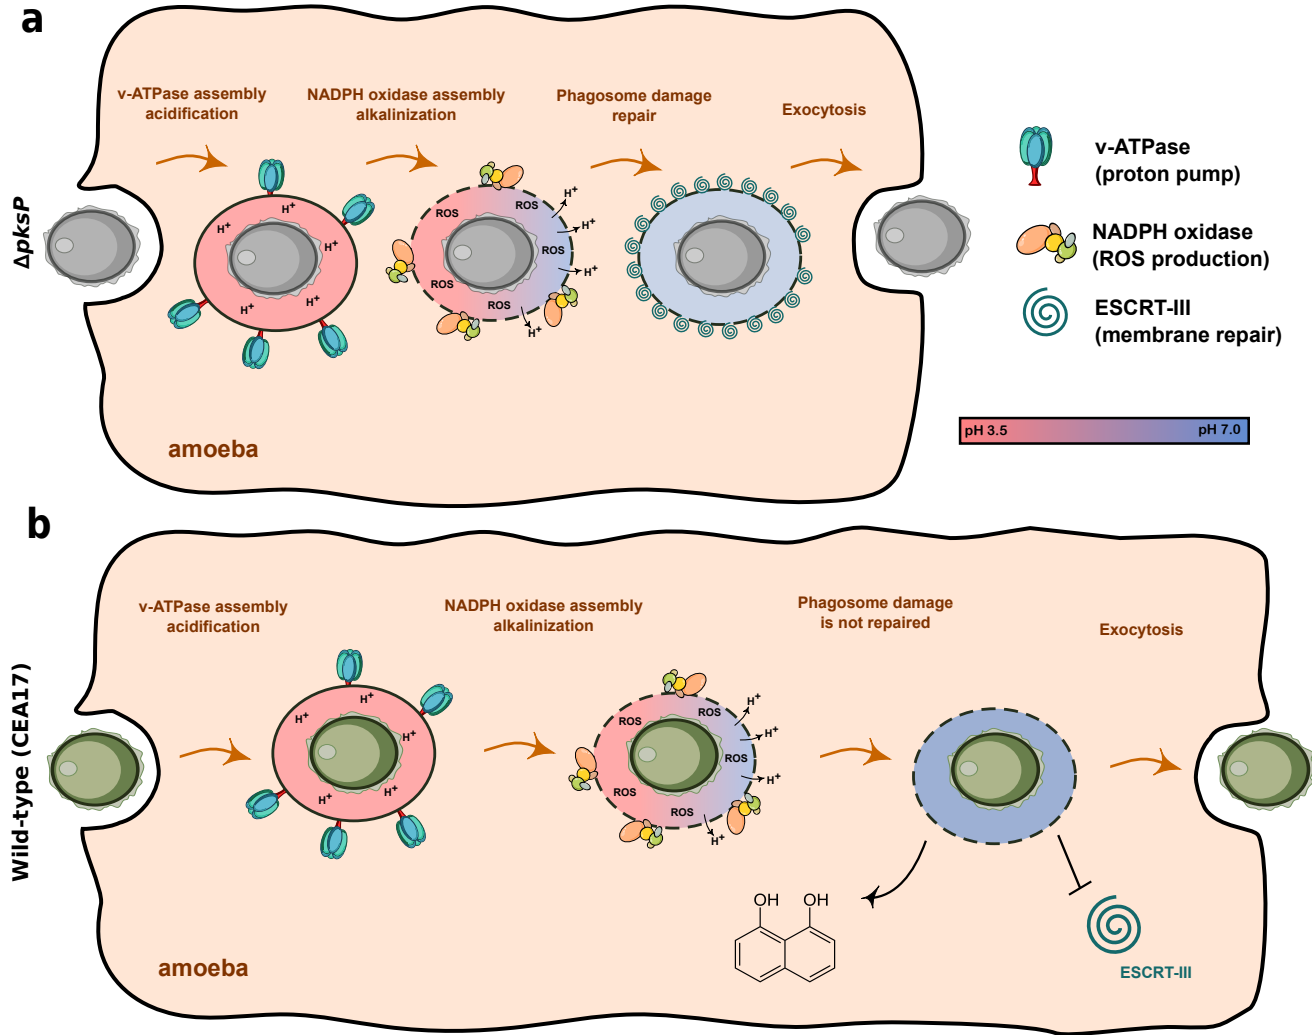

**Fig 8.** Model for phagosome maturation of *D. discoideum* infected with conidia of *A. fumigatus*. Conidia are acidified in phagosomes within the first minutes after uptake. This process is only marginally affected by DHN-melanin. However, intracellular re-neutralization via ROS is delayed. Intracellular processing induces damage to phagolysosomes which recruits the ESCRT-III repair machinery only with melanin deficient conidia, which are subsequently undergoing exocytosis. The recruitment is repressed by DHN-melanin inducing more damage with prolonged intracellular retention.
